# Supplementary material for: Large spatiotemporal variability in aerosol properties over central Argentina during the CACTI field campaign
Source: Copernicus journal article supplement (doi:10.5194/acp-24-13477-2024), 2024-12-09
Supplement: Supplementary file 1 [file acp-24-13477-2024-supplement.pdf]

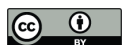

*Supplement of*

## **Large spatiotemporal variability in aerosol properties over central Argentina during the CACTI field campaign**

**Jerome D. Fast et al.**

*Correspondence to:* Jerome D. Fast ([jerome.fast@pnnl.gov](mailto:jerome.fast@pnnl.gov))

The copyright of individual parts of the supplement might differ from the article licence.

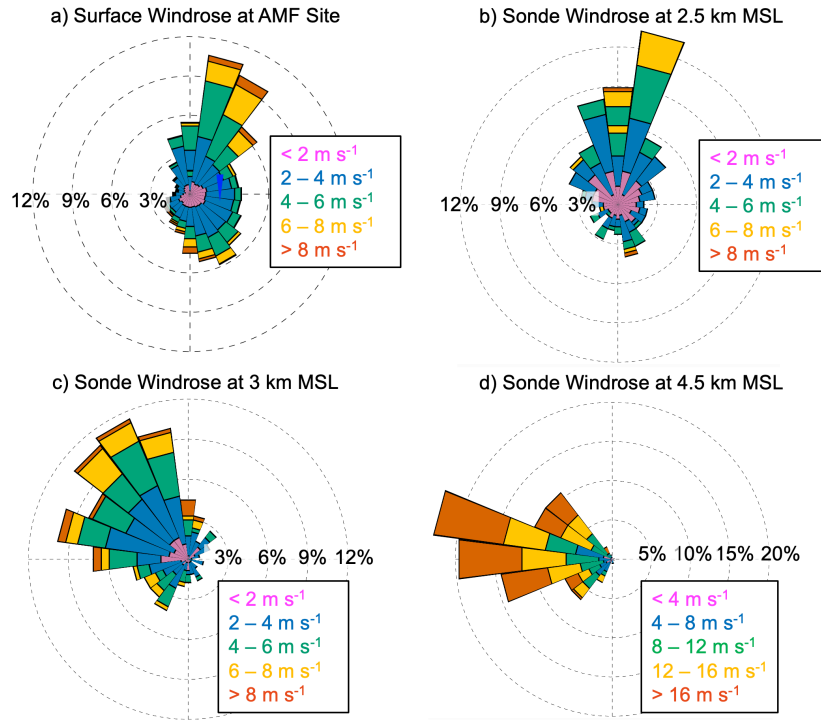

1  
2  
3  
4

Figure S1. Wind roses based on a) surface measurements and radiosonde measurements at b) 2.5, c) 3.0, and d) 4.5 km MSL between October 23 and December 15.

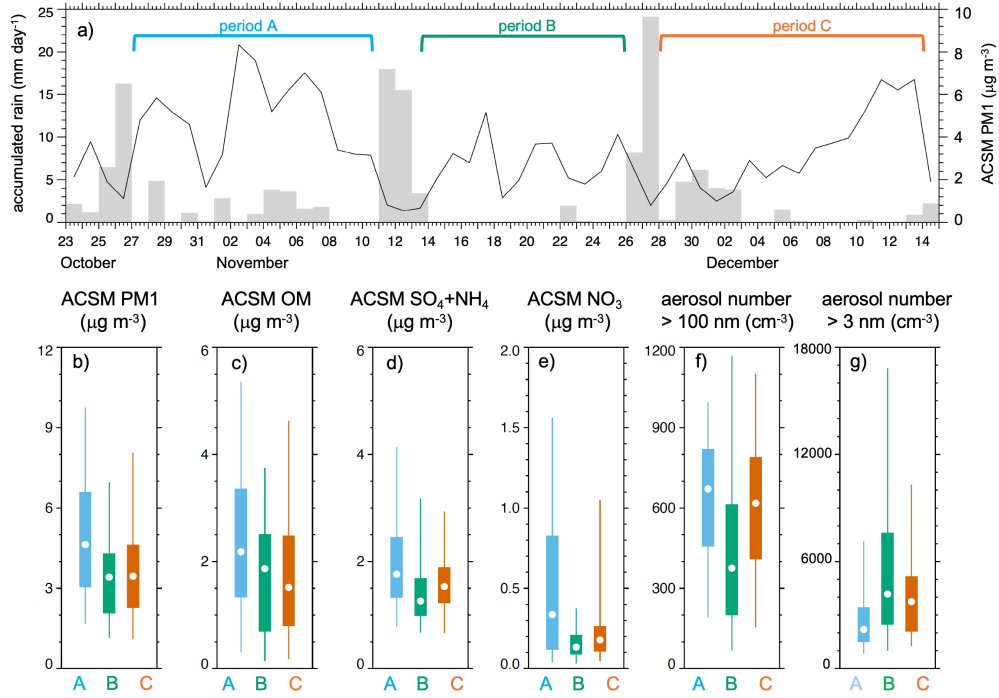

5

6 Figure S2. a) Daily averages of ACSM PM1 concentrations and accumulated rain from the optical rain  
 7 gauge instrument between October 23 and December 15 that define periods A, B, and C,  
 8 along with percentiles of b) PM1, c) OM, d) SO<sub>4</sub>+NH<sub>4</sub>, e) NO<sub>3</sub>, f) aerosol number > 100 nm  
 9 and g) aerosol number > 3 nm during periods A, B, and C.

10

11

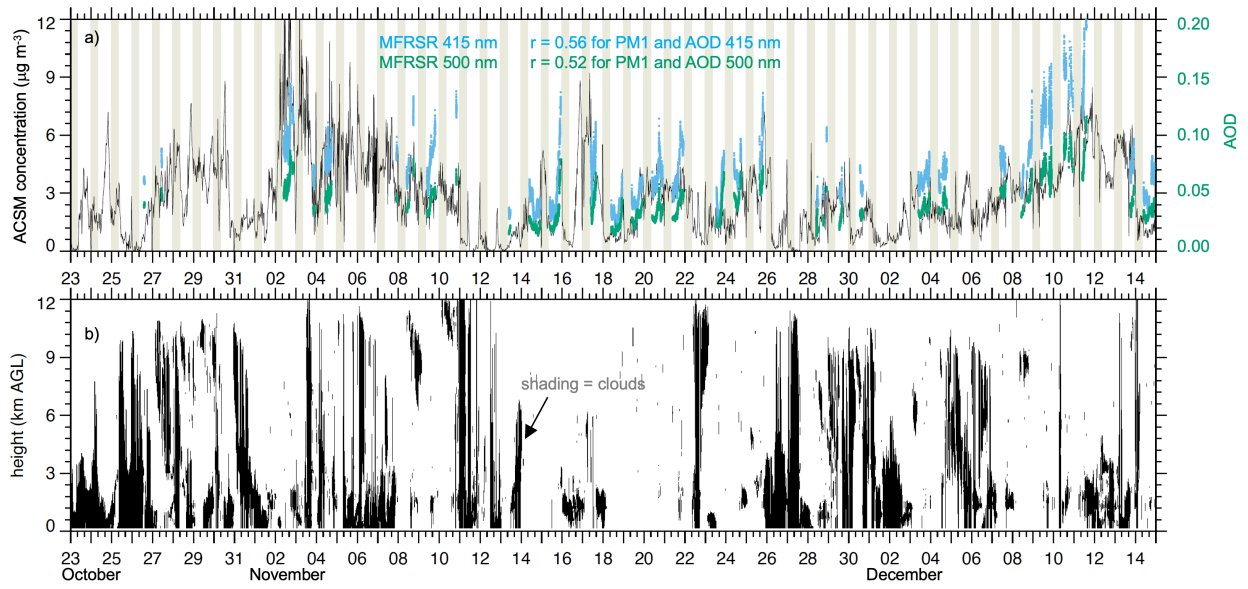

12

13 Figure S3. Time series of a) ACSM PM1 concentration and AOD at 415 and 500 nm and b) vertical  
14 distribution of clouds from KAZR-ARSCL. Color bar at the top of b) denotes radiosonde  
15 wind directions at  $\sim 2$  km MSL.

16

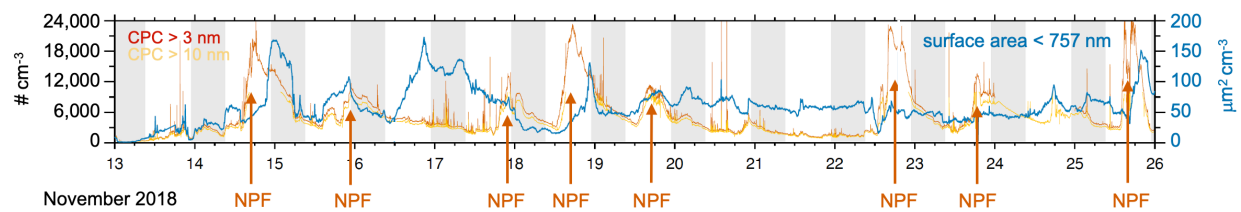

17  
18  
19  
20  
21

Figure S4. Total particle concentrations and surface area for particles with diameters < 757 nm during period B that has several NPF events.

22

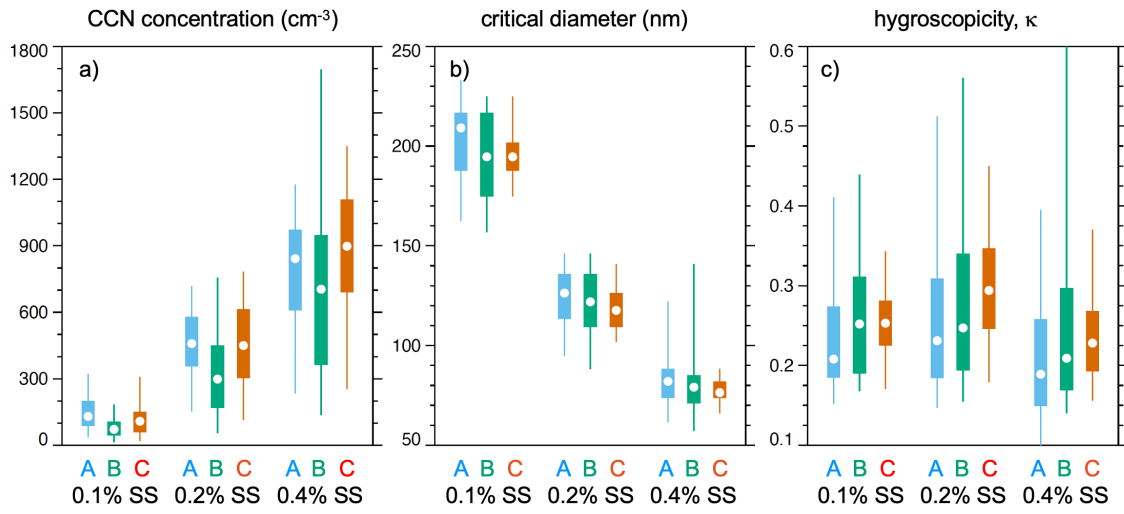

23

24 Figure S5. Percentiles of a) CCN concentration, b) critical diameter, and c) hygroscopicity during  
25 periods A, B, and C for 0.1, 0.2 and 0.4% supersaturations.

26

27

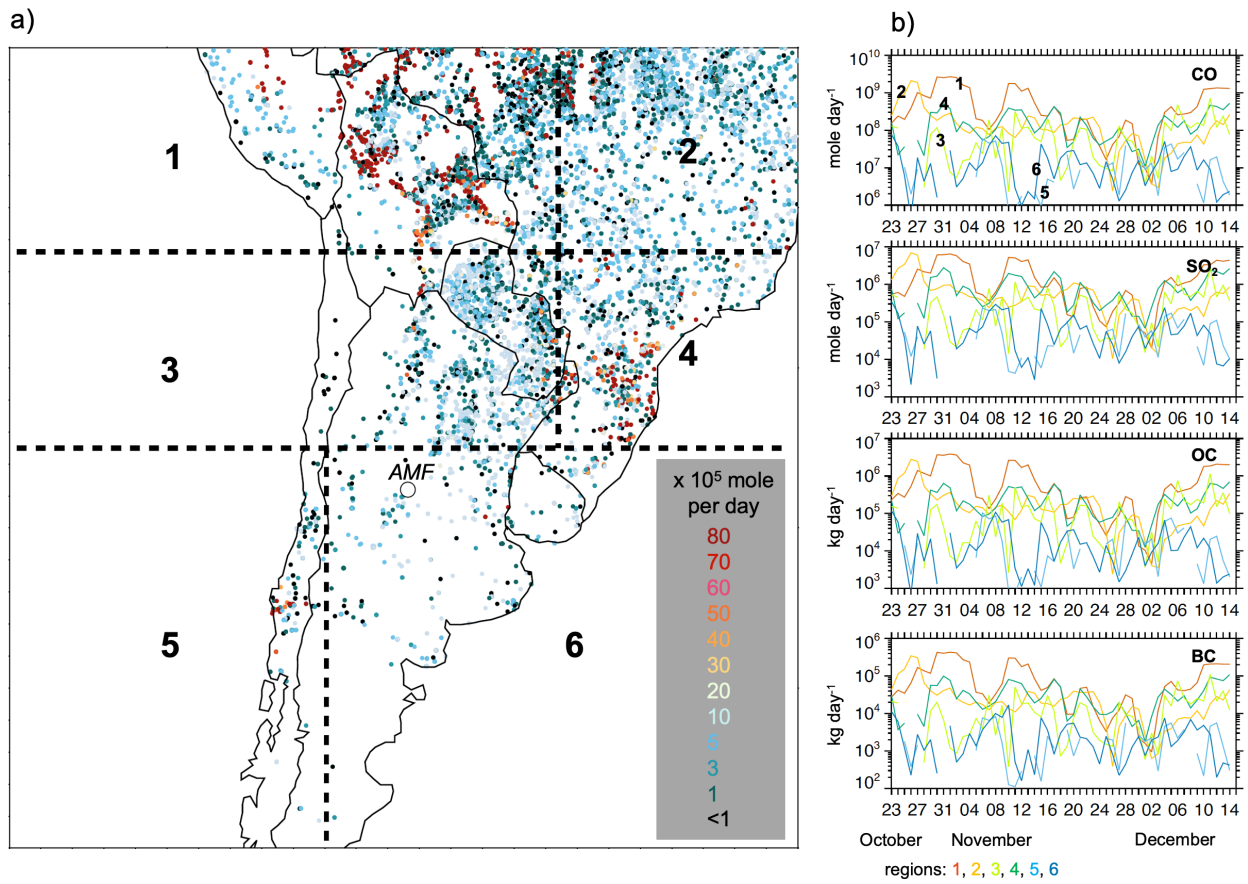

28

29 Figure S6. a) FINN emissions of CO from individual fires between October 23 and December 15 over  
30 South America and b) daily variation in total CO, SO<sub>2</sub>, OC, and BC emissions (right panels)  
31 defined by the six regions over South America.

32

33

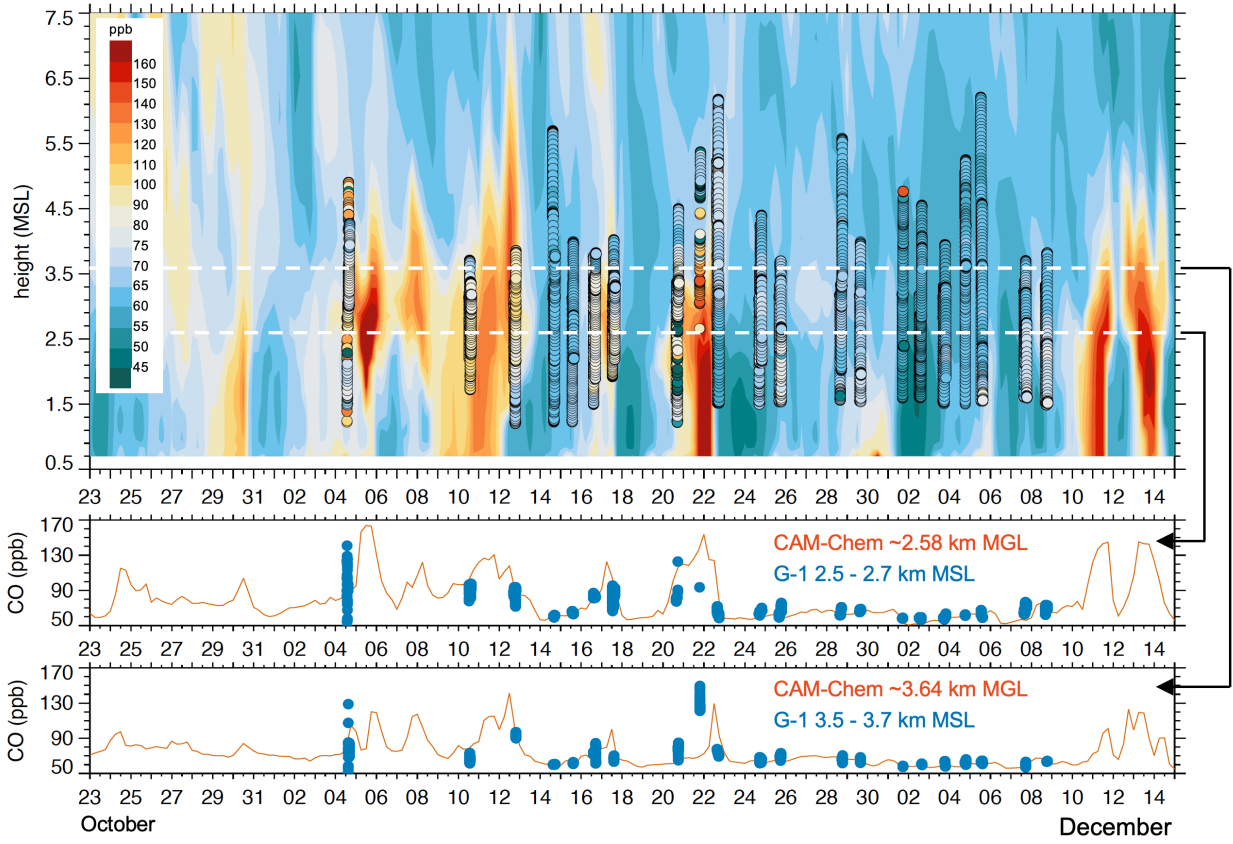

34

35 Figure S7. Temporal variation of CAM-Chem simulated CO profiles over the AMF site along with  
36 aircraft measurements (dots). Lower two panels depict time series of observed (blue dots) and  
37 simulated (red line) CO at ~2.58 and ~3.64 km MSL.  
38



39

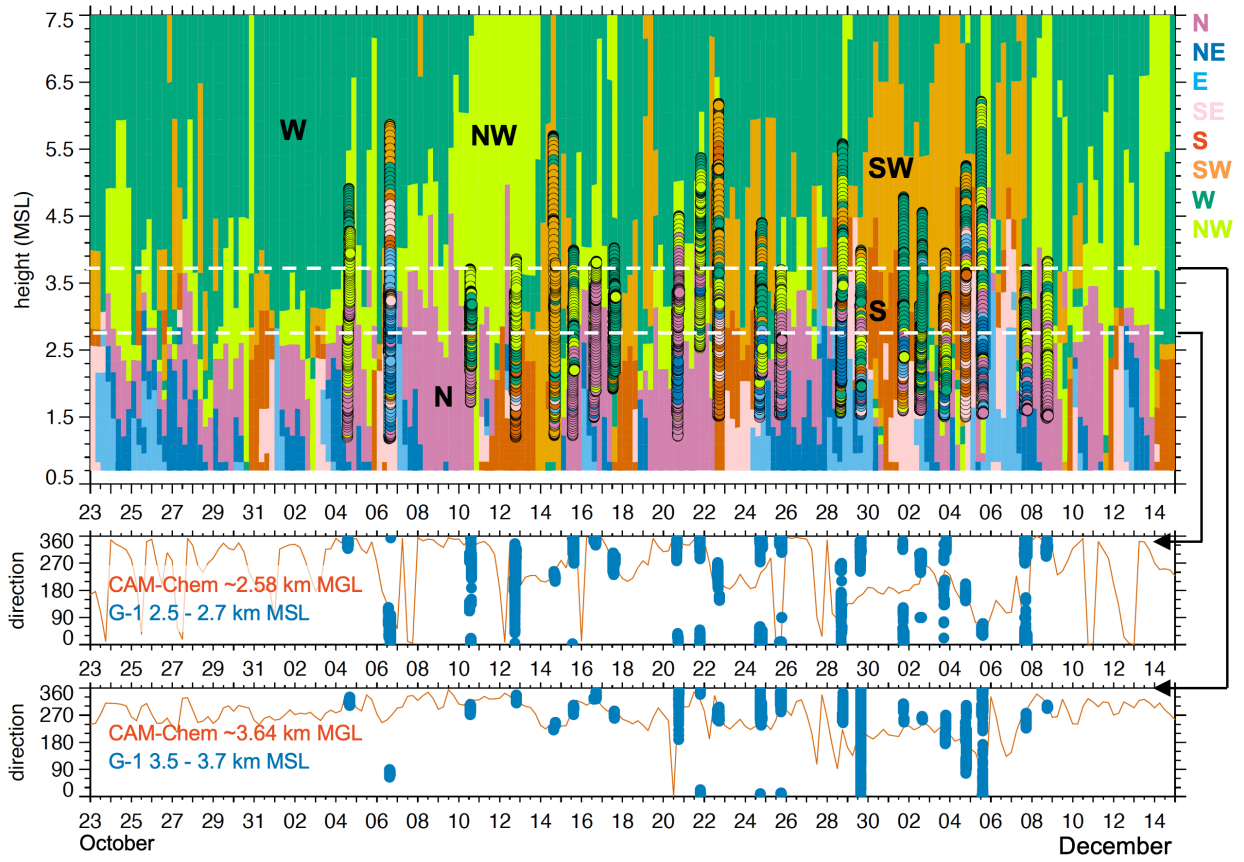

40

41 Figure S8. Same as Fig. S7, except for wind direction.

42

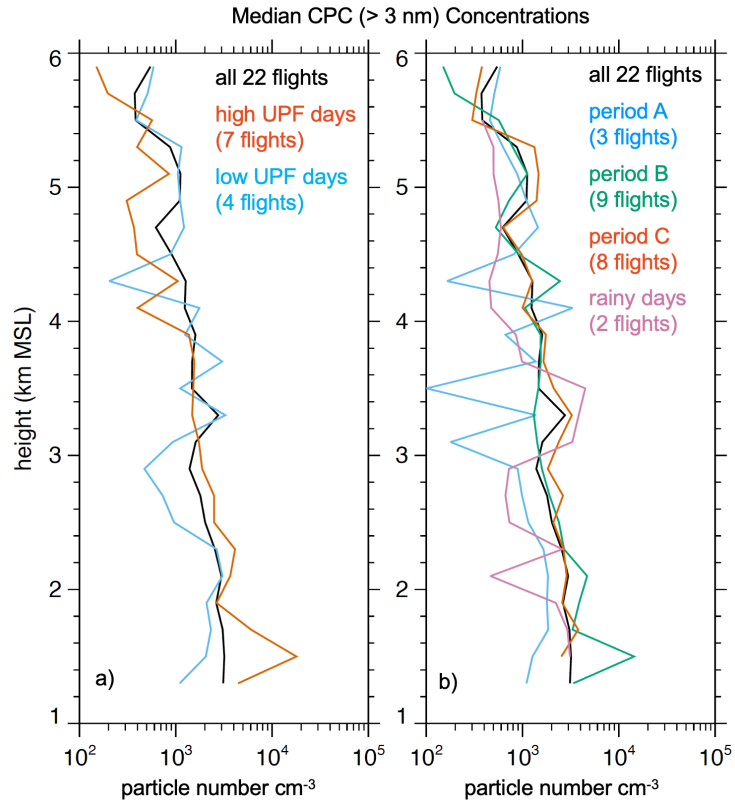

43

44 Figure S9. Profiles of median particle number concentrations (> 3 nm) for all aircraft flights and flights  
 45 divided into a) low and high UPF days and b) periods A, B, and C.

46

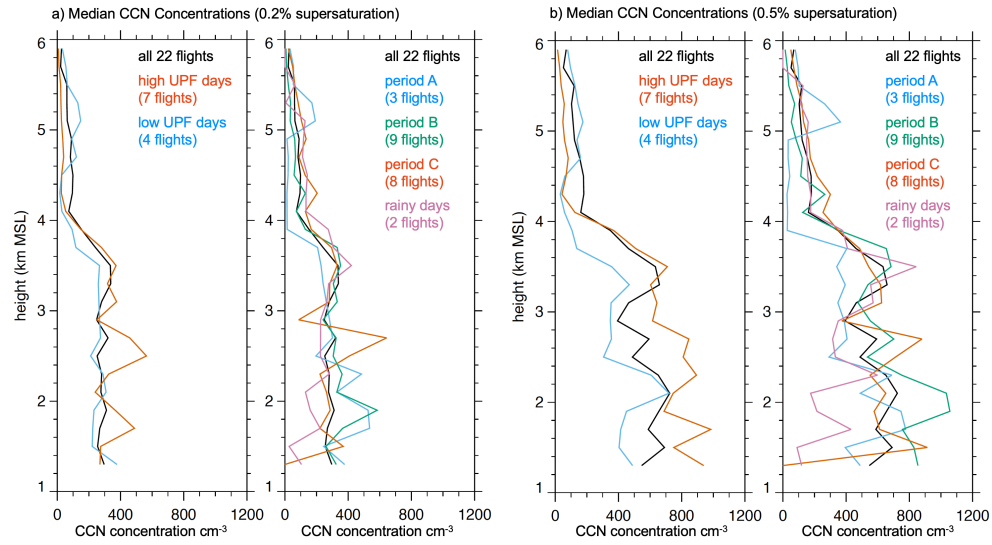

47

48 Figure S10. Same as Fig. S5, except for CCN concentrations at a) 0.2% and b) 0.5% supersaturations.

49

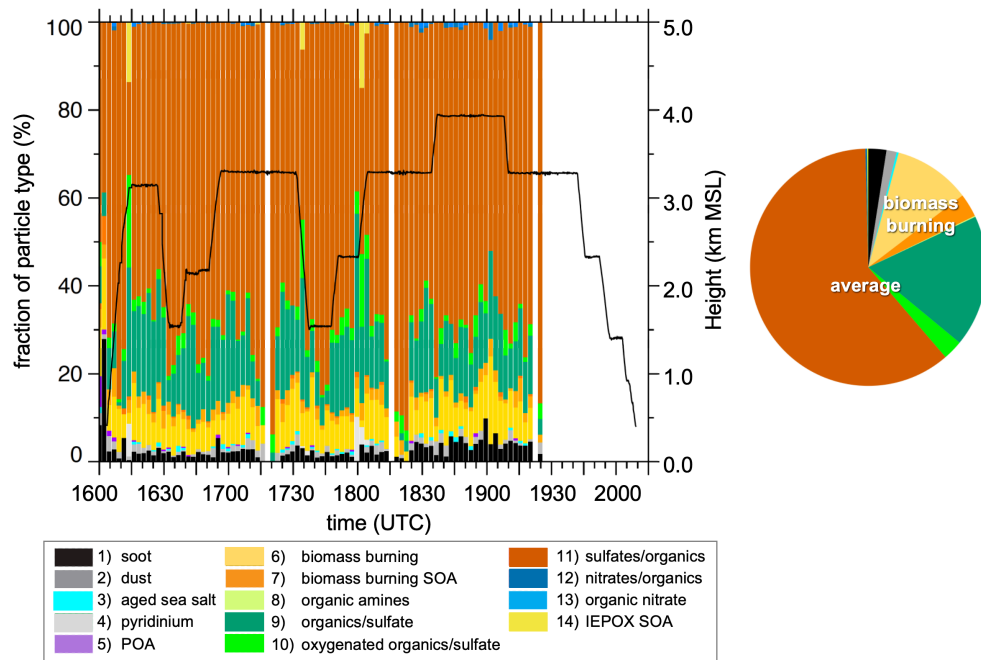

50

51 Figure S11. Particle classes derived from the aircraft miniSPLAT mixing state measurements on  
 52 December 3.

53
